# Supplementary material
Source: PubMed Central journal article supplement (PMC3669256)
Supplement: NIHMS446488-supplement-01.pdf [file NIHMS446488-supplement-01.pdf]

## **SUPPLEMENTARY TABLES**

### **Prenatal Dexamethasone Enhances the Developmental Neurotoxicity of Chlorpyrifos: Implications for Vulnerability after Pharmacotherapy for Preterm Labor**

Theodore A. Slotkin, Jennifer Card, Alice Infante and Frederic J. Seidler

**SUPPLEMENTAL TABLE 1: Body Weights (mean ± SE)**

| Postnatal Age | Male Body Weight (grams) |            |            |            | Female Body Weight (grams) |            |            |            |
|---------------|--------------------------|------------|------------|------------|----------------------------|------------|------------|------------|
|               | Control                  | Dex        | CPF        | Dex+CPF    | Control                    | Dex        | CPF        | Dex+CPF    |
| 1             | 7.3 ± 0.1                | 6.4 ± 0.1  | 7.3 ± 0.1  | 6.5 ± 0.1  | 6.9 ± 0.1                  | 6.2 ± 0.1  | 6.9 ± 0.1  | 6.2 ± 0.1  |
| 2             | 8.3 ± 0.1                | 6.9 ± 0.1  | 8.0 ± 0.1  | 6.8 ± 0.1  | 7.7 ± 0.1                  | 6.6 ± 0.1  | 7.4 ± 0.1  | 6.7 ± 0.1  |
| 3             | 9.1 ± 0.1                | 7.8 ± 0.1  | 8.9 ± 0.1  | 7.9 ± 0.1  | 8.7 ± 0.1                  | 7.4 ± 0.1  | 8.4 ± 0.1  | 7.4 ± 0.1  |
| 4             | 10.5 ± 0.1               | 9.2 ± 0.1  | 10.1 ± 0.1 | 9.4 ± 0.1  | 9.9 ± 0.1                  | 8.7 ± 0.1  | 9.7 ± 0.1  | 8.6 ± 0.1  |
| 7             | 15.3 ± 0.1               | 13.9 ± 0.1 | 14.9 ± 0.1 | 14.2 ± 0.2 | 14.7 ± 0.2                 | 13.5 ± 0.1 | 14.4 ± 0.2 | 13.4 ± 0.2 |
| 10            | 21.3 ± 0.3               | 20 ± 0.2   | 20.2 ± 0.4 | 19.7 ± 0.4 | 20.5 ± 0.3                 | 19.2 ± 0.2 | 19.6 ± 0.4 | 18.8 ± 0.3 |
| 14            | 30.4 ± 0.3               | 28.8 ± 0.4 | 29.4 ± 0.5 | 28.5 ± 0.5 | 29.5 ± 0.3                 | 27.5 ± 0.3 | 28.6 ± 0.5 | 27.5 ± 0.4 |
| 17            | 36.7 ± 0.2               | 34.9 ± 0.4 | 35.8 ± 0.6 | 34.9 ± 0.6 | 35.6 ± 0.3                 | 33.3 ± 0.5 | 34.7 ± 0.6 | 33.4 ± 0.4 |
| 21            | 48.3 ± 0.4               | 47.3 ± 0.6 | 49.3 ± 0.5 | 48.8 ± 0.5 | 47.3 ± 0.5                 | 45.7 ± 0.6 | 47.7 ± 0.6 | 45.7 ± 0.7 |
| 30            | 98 ± 1                   | 92 ± 1     | 97 ± 1     | 94 ± 1     | 91 ± 1                     | 86 ± 1     | 88 ± 1     | 86 ± 1     |
| 45            | 242 ± 2                  | 229 ± 3    | 239 ± 3    | 231 ± 3    | 181 ± 2                    | 175 ± 2    | 178 ± 2    | 174 ± 3    |
| 60            | 354 ± 5                  | 339 ± 5    | 348 ± 5    | 344 ± 4    | 232 ± 2                    | 218 ± 3    | 225 ± 3    | 222 ± 3    |
| 80            | 471 ± 8                  | 449 ± 6    | 468 ± 8    | 454 ± 7    | 271 ± 4                    | 251 ± 5    | 266 ± 5    | 257 ± 5    |
| 100           | 539 ± 10                 | 500 ± 10   | 530 ± 9    | 519 ± 10   | 289 ± 4                    | 268 ± 4    | 279 ± 5    | 274 ± 4    |
| 125           | 607 ± 18                 | 553 ± 14   | 585 ± 14   | 576 ± 14   | 308 ± 6                    | 282 ± 6    | 300 ± 10   | 289 ± 7    |
| 150           | 643 ± 18                 | 580 ± 15   | 608 ± 16   | 612 ± 15   | 314 ± 6                    | 286 ± 6    | 311 ± 9    | 294 ± 6    |

Abbreviations: Dex = Dexamethasone; CPF = Chlorpyrifos

**SUPPLEMENTAL TABLE 2: Brain Region Weights (mean ± SE)**

| Region                    | Postnatal Age | Male Brain Region Weights (mg) |          |         |          | Female Brain Region Weights (mg) |          |          |          |
|---------------------------|---------------|--------------------------------|----------|---------|----------|----------------------------------|----------|----------|----------|
|                           |               | Control                        | Dex      | CPF     | Dex+CPF  | Control                          | Dex      | CPF      | Dex+CPF  |
| frontal/parietal cortex   | 30            | 243 ± 5                        | 235 ± 10 | 237 ± 2 | 246 ± 5  | 239 ± 8                          | 238 ± 7  | 231 ± 7  | 237 ± 6  |
|                           | 60            | 276 ± 5                        | 256 ± 13 | 274 ± 9 | 266 ± 6  | 235 ± 13                         | 249 ± 7  | 251 ± 4  | 252 ± 6  |
|                           | 100           | 284 ± 10                       | 289 ± 16 | 281 ± 7 | 284 ± 5  | 268 ± 11                         | 252 ± 12 | 274 ± 7  | 273 ± 7  |
|                           | 150           | 277 ± 9                        | 283 ± 5  | 281 ± 7 | 269 ± 11 | 274 ± 8                          | 284 ± 6  | 274 ± 13 | 247 ± 4  |
| temporal/occipital cortex | 30            | 160 ± 3                        | 178 ± 8  | 167 ± 8 | 165 ± 6  | 148 ± 5                          | 154 ± 4  | 172 ± 4  | 156 ± 5  |
|                           | 60            | 201 ± 12                       | 190 ± 7  | 192 ± 9 | 191 ± 6  | 194 ± 6                          | 194 ± 8  | 186 ± 4  | 170 ± 13 |
|                           | 100           | 206 ± 6                        | 198 ± 12 | 212 ± 7 | 217 ± 6  | 187 ± 11                         | 182 ± 7  | 183 ± 8  | 185 ± 5  |
|                           | 150           | 203 ± 8                        | 211 ± 9  | 204 ± 7 | 210 ± 13 | 193 ± 6                          | 184 ± 6  | 192 ± 8  | 194 ± 4  |
| hippocampus               | 30            | 104 ± 1                        | 98 ± 2   | 105 ± 2 | 100 ± 1  | 99 ± 4                           | 97 ± 3   | 100 ± 4  | 102 ± 3  |
|                           | 60            | 114 ± 5                        | 111 ± 4  | 119 ± 4 | 113 ± 3  | 105 ± 5                          | 98 ± 6   | 107 ± 4  | 104 ± 6  |
|                           | 100           | 131 ± 5                        | 124 ± 3  | 127 ± 2 | 132 ± 4  | 121 ± 5                          | 117 ± 3  | 120 ± 3  | 120 ± 3  |
|                           | 150           | 138 ± 3                        | 132 ± 4  | 136 ± 3 | 127 ± 3  | 122 ± 3                          | 124 ± 2  | 126 ± 3  | 124 ± 4  |
| striatum                  | 30            | 102 ± 6                        | 101 ± 3  | 96 ± 3  | 111 ± 5  | 101 ± 4                          | 107 ± 3  | 108 ± 6  | 99 ± 5   |
|                           | 60            | 112 ± 4                        | 120 ± 3  | 111 ± 5 | 111 ± 8  | 117 ± 5                          | 109 ± 5  | 110 ± 5  | 119 ± 8  |
|                           | 100           | 131 ± 8                        | 127 ± 6  | 130 ± 4 | 130 ± 3  | 132 ± 5                          | 122 ± 6  | 116 ± 4  | 126 ± 5  |
|                           | 150           | 142 ± 5                        | 154 ± 3  | 141 ± 6 | 130 ± 4  | 128 ± 5                          | 134 ± 9  | 139 ± 5  | 125 ± 4  |
| midbrain                  | 30            | 245 ± 5                        | 240 ± 6  | 236 ± 5 | 246 ± 4  | 231 ± 3                          | 231 ± 5  | 232 ± 2  | 237 ± 5  |
|                           | 60            | 302 ± 9                        | 304 ± 8  | 298 ± 7 | 298 ± 4  | 281 ± 5                          | 282 ± 6  | 269 ± 8  | 279 ± 5  |
|                           | 100           | 323 ± 5                        | 307 ± 7  | 313 ± 9 | 322 ± 7  | 302 ± 5                          | 287 ± 4  | 289 ± 7  | 286 ± 4  |
|                           | 150           | 343 ± 5                        | 342 ± 5  | 349 ± 4 | 316 ± 9  | 320 ± 4                          | 312 ± 5  | 317 ± 4  | 312 ± 6  |
| brainstem                 | 30            | 147 ± 5                        | 148 ± 5  | 143 ± 5 | 142 ± 6  | 139 ± 4                          | 138 ± 5  | 140 ± 2  | 140 ± 6  |
|                           | 60            | 205 ± 4                        | 198 ± 3  | 205 ± 7 | 191 ± 10 | 192 ± 4                          | 193 ± 3  | 183 ± 2  | 183 ± 7  |
|                           | 100           | 239 ± 9                        | 232 ± 6  | 234 ± 6 | 227 ± 20 | 221 ± 3                          | 214 ± 7  | 204 ± 4  | 199 ± 15 |
|                           | 150           | 250 ± 5                        | 257 ± 9  | 258 ± 7 | 251 ± 7  | 225 ± 6                          | 226 ± 3  | 231 ± 8  | 222 ± 4  |

Weights for frontal/parietal cortex and temporal/occipital cortex are for the left hemisphere only.  
Abbreviations: Dex = Dexamethasone; CPF = Chlorpyrifos

**SUPPLEMENTAL TABLE 3: nAChR Binding (mean ± SE)**

| Region                    | Postnatal Age | Male (fmol/mg protein) |        |         |         | Female (fmol/mg protein) |        |        |         |
|---------------------------|---------------|------------------------|--------|---------|---------|--------------------------|--------|--------|---------|
|                           |               | Control                | Dex    | CPF     | Dex+CPF | Control                  | Dex    | CPF    | Dex+CPF |
| frontal/parietal cortex   | 30            | 66 ± 2                 | 72 ± 3 | 73 ± 6  | 67 ± 4  | 76 ± 3                   | 74 ± 3 | 69 ± 3 | 63 ± 5  |
|                           | 60            | 75 ± 3                 | 68 ± 1 | 66 ± 4  | 64 ± 4  | 70 ± 2                   | 64 ± 4 | 66 ± 3 | 67 ± 6  |
|                           | 100           | 58 ± 2                 | 59 ± 4 | 58 ± 3  | 57 ± 2  | 54 ± 3                   | 57 ± 4 | 54 ± 3 | 53 ± 4  |
|                           | 150           | 36 ± 3                 | 35 ± 2 | 38 ± 3  | 31 ± 1  | 37 ± 3                   | 35 ± 2 | 38 ± 1 | 33 ± 1  |
| temporal/occipital cortex | 30            | 66 ± 5                 | 66 ± 2 | 69 ± 5  | 61 ± 4  | 74 ± 5                   | 67 ± 4 | 66 ± 4 | 60 ± 4  |
|                           | 60            | 65 ± 2                 | 78 ± 5 | 69 ± 3  | 68 ± 3  | 70 ± 3                   | 58 ± 1 | 65 ± 1 | 61 ± 2  |
|                           | 100           | 62 ± 2                 | 62 ± 3 | 56 ± 1  | 59 ± 4  | 56 ± 3                   | 58 ± 3 | 50 ± 2 | 55 ± 4  |
|                           | 150           | 54 ± 2                 | 58 ± 4 | 60 ± 3  | 51 ± 2  | 55 ± 2                   | 57 ± 3 | 53 ± 4 | 54 ± 4  |
| hippocampus               | 30            | 43 ± 5                 | 45 ± 3 | 51 ± 3  | 42 ± 2  | 44 ± 3                   | 47 ± 3 | 47 ± 4 | 54 ± 4  |
|                           | 60            | 26 ± 1                 | 29 ± 1 | 31 ± 2  | 28 ± 2  | 30 ± 2                   | 24 ± 1 | 31 ± 3 | 26 ± 3  |
|                           | 100           | 29 ± 2                 | 36 ± 3 | 31 ± 2  | 34 ± 2  | 28 ± 2                   | 34 ± 2 | 30 ± 2 | 27 ± 1  |
|                           | 150           | 25 ± 1                 | 29 ± 2 | 34 ± 2  | 29 ± 2  | 29 ± 1                   | 31 ± 2 | 30 ± 1 | 31 ± 3  |
| striatum                  | 30            | 79 ± 5                 | 74 ± 4 | 74 ± 3  | 69 ± 5  | 80 ± 4                   | 79 ± 2 | 78 ± 5 | 69 ± 4  |
|                           | 60            | 84 ± 2                 | 83 ± 4 | 76 ± 5  | 85 ± 2  | 85 ± 2                   | 83 ± 3 | 80 ± 4 | 76 ± 2  |
|                           | 100           | 53 ± 5                 | 65 ± 5 | 73 ± 8  | 68 ± 6  | 56 ± 2                   | 68 ± 3 | 64 ± 3 | 64 ± 2  |
|                           | 150           | 78 ± 1                 | 77 ± 4 | 76 ± 3  | 77 ± 3  | 81 ± 3                   | 75 ± 1 | 79 ± 4 | 72 ± 2  |
| midbrain                  | 30            | 89 ± 3                 | 99 ± 5 | 100 ± 5 | 89 ± 4  | 95 ± 3                   | 99 ± 8 | 94 ± 5 | 91 ± 5  |
|                           | 60            | 77 ± 5                 | 79 ± 5 | 73 ± 2  | 77 ± 4  | 83 ± 3                   | 74 ± 3 | 74 ± 4 | 74 ± 2  |
|                           | 100           | 75 ± 3                 | 82 ± 4 | 71 ± 4  | 72 ± 3  | 84 ± 6                   | 73 ± 5 | 80 ± 4 | 72 ± 4  |
|                           | 150           | 76 ± 3                 | 86 ± 4 | 75 ± 3  | 90 ± 6  | 79 ± 3                   | 80 ± 2 | 83 ± 3 | 78 ± 2  |
| brainstem                 | 30            | 40 ± 2                 | 43 ± 1 | 40 ± 1  | 36 ± 2  | 45 ± 3                   | 44 ± 2 | 44 ± 1 | 41 ± 2  |
|                           | 60            | 29 ± 1                 | 33 ± 2 | 32 ± 2  | 30 ± 1  | 32 ± 1                   | 32 ± 2 | 31 ± 2 | 31 ± 1  |
|                           | 100           | 27 ± 1                 | 31 ± 1 | 29 ± 1  | 28 ± 1  | 28 ± 1                   | 28 ± 1 | 27 ± 1 | 29 ± 1  |
|                           | 150           | 25 ± 1                 | 28 ± 1 | 27 ± 1  | 29 ± 1  | 30 ± 2                   | 28 ± 1 | 29 ± 1 | 33 ± 3  |

Abbreviations: Dex = Dexamethasone; CPF = Chlorpyrifos

Note that the assays for each region and age were run in separate experiments, so absolute values cannot be compared strictly across ages or between regions.

**SUPPLEMENTAL TABLE 4: HC3 Binding (mean ± SE)**

| Region                    | Postnatal Age | Male (fmol/mg protein) |            |            |            | Female (fmol/mg protein) |            |            |            |
|---------------------------|---------------|------------------------|------------|------------|------------|--------------------------|------------|------------|------------|
|                           |               | Control                | Dex        | CPF        | Dex+CPF    | Control                  | Dex        | CPF        | Dex+CPF    |
| frontal/parietal cortex   | 30            | 14.9 ± 0.7             | 14.6 ± 0.9 | 16.6 ± 1.2 | 14.5 ± 0.6 | 14.7 ± 0.9               | 15.3 ± 1.6 | 13.5 ± 0.8 | 12.4 ± 0.5 |
|                           | 60            | 14.9 ± 1.4             | 14.4 ± 1.0 | 13.3 ± 1.4 | 12.6 ± 1.2 | 16.6 ± 1.8               | 13.5 ± 1.5 | 15.8 ± 1.8 | 11.4 ± 0.3 |
|                           | 100           | 13.7 ± 0.8             | 13.7 ± 0.6 | 11.9 ± 1.3 | 10.1 ± 0.7 | 13.7 ± 0.7               | 14.6 ± 1.0 | 12.8 ± 1.1 | 11.9 ± 0.7 |
|                           | 150           | 14.2 ± 0.9             | 12.5 ± 0.6 | 13.7 ± 1.5 | 11.2 ± 1.2 | 13.4 ± 1.7               | 13.8 ± 0.7 | 13.7 ± 0.7 | 12.2 ± 0.9 |
| temporal/occipital cortex | 30            | 7.3 ± 0.8              | 8.3 ± 0.8  | 7.2 ± 1.0  | 6.7 ± 1.2  | 7.6 ± 0.7                | 7.0 ± 0.8  | 9.1 ± 1.1  | 7.3 ± 0.6  |
|                           | 60            | 7.0 ± 0.8              | 8.7 ± 0.9  | 5.5 ± 0.6  | 5.5 ± 0.3  | 7.2 ± 0.4                | 6.7 ± 1.1  | 5.7 ± 0.3  | 6.1 ± 0.6  |
|                           | 100           | 5.9 ± 0.7              | 6.6 ± 1.1  | 4.9 ± 0.8  | 5.8 ± 0.3  | 5.6 ± 0.5                | 6.3 ± 0.7  | 6.6 ± 0.7  | 4.9 ± 0.8  |
|                           | 150           | 11.2 ± 1.2             | 10.6 ± 1.1 | 11.0 ± 0.6 | 9.7 ± 0.5  | 11.0 ± 0.7               | 11.5 ± 1.4 | 10.1 ± 0.7 | 10.2 ± 0.7 |
| hippocampus               | 30            | 10.6 ± 1.2             | 9.7 ± 0.7  | 9.3 ± 0.7  | 10.1 ± 0.9 | 11.0 ± 0.6               | 11.3 ± 0.8 | 10.1 ± 0.8 | 10.2 ± 1.2 |
|                           | 60            | 10.9 ± 1.7             | 10.6 ± 1.0 | 9.5 ± 1.0  | 9.3 ± 0.5  | 9.8 ± 0.6                | 8.4 ± 0.5  | 9.6 ± 0.9  | 10.1 ± 0.8 |
|                           | 100           | 7.7 ± 1.5              | 7.5 ± 0.7  | 7.9 ± 1.0  | 7.6 ± 1.1  | 8.3 ± 1.0                | 9.5 ± 0.8  | 10.2 ± 1.9 | 6.2 ± 1.4  |
|                           | 150           | 13.1 ± 0.7             | 13.6 ± 0.8 | 14.6 ± 1.1 | 13.2 ± 0.9 | 14.6 ± 1.2               | 14.3 ± 0.7 | 12.9 ± 0.7 | 12.6 ± 0.8 |
| striatum                  | 30            | 42 ± 5                 | 40 ± 2     | 35 ± 2     | 33 ± 2     | 40 ± 3                   | 38 ± 2     | 35 ± 3     | 38 ± 2     |
|                           | 60            | 62 ± 12                | 50 ± 3     | 54 ± 2     | 48 ± 5     | 54 ± 2                   | 50 ± 5     | 48 ± 5     | 38 ± 2     |
|                           | 100           | 35 ± 3                 | 32 ± 2     | 36 ± 3     | 33 ± 1     | 29 ± 2                   | 34 ± 2     | 32 ± 3     | 33 ± 2     |
|                           | 150           | 45 ± 3                 | 40 ± 3     | 35 ± 1     | 40 ± 3     | 42 ± 2                   | 38 ± 2     | 40 ± 1     | 35 ± 2     |
| midbrain                  | 30            | 6.4 ± 0.5              | 7.6 ± 1.0  | 7.9 ± 0.7  | 8.3 ± 0.7  | 7.3 ± 0.8                | 8.1 ± 1.2  | 8.3 ± 0.6  | 8.1 ± 1.0  |
|                           | 60            | 8.4 ± 1.5              | 8.3 ± 1.1  | 6.6 ± 0.9  | 6.1 ± 0.5  | 7.7 ± 0.6                | 7.0 ± 0.6  | 7.0 ± 0.7  | 7.1 ± 0.3  |
|                           | 100           | 5.6 ± 0.3              | 7.3 ± 0.6  | 6.0 ± 0.4  | 6.8 ± 0.7  | 6.3 ± 0.5                | 5.6 ± 0.5  | 7.4 ± 0.5  | 6.6 ± 0.9  |
|                           | 150           | 9.2 ± 1.1              | 8.0 ± 1.0  | 7.8 ± 0.5  | 9.1 ± 0.5  | 7.7 ± 0.5                | 7.4 ± 1.0  | 8.0 ± 0.4  | 6.9 ± 0.5  |
| brainstem                 | 30            | 6.7 ± 0.4              | 7.3 ± 0.6  | 4.9 ± 0.5  | 8.1 ± 1.0  | 5.9 ± 0.4                | 6.4 ± 0.7  | 5.7 ± 0.4  | 6.5 ± 0.5  |
|                           | 60            | 4.7 ± 0.4              | 6.5 ± 0.5  | 4.9 ± 0.4  | 5.6 ± 0.5  | 5.8 ± 0.3                | 5.4 ± 0.5  | 5.8 ± 0.3  | 6.0 ± 0.4  |
|                           | 100           | 3.8 ± 0.3              | 4.7 ± 0.7  | 3.2 ± 0.5  | 3.7 ± 0.3  | 3.3 ± 0.4                | 4.0 ± 0.5  | 3.8 ± 0.4  | 4.1 ± 0.8  |
|                           | 150           | 5.3 ± 0.6              | 4.3 ± 0.2  | 3.9 ± 0.5  | 4.1 ± 0.2  | 4.0 ± 0.4                | 4.1 ± 0.4  | 3.4 ± 0.4  | 4.1 ± 0.3  |

Abbreviations: Dex = Dexamethasone; CPF = Chlorpyrifos

Note that the assays for each region and age were run in separate experiments, so absolute values cannot be compared strictly across ages or between regions.

**SUPPLEMENTAL TABLE 5: ChAT Activity (mean ± SE)**

| Region                    | Postnatal Age | Male (fmol/mg protein) |             |             |             | Female (fmol/mg protein) |             |             |             |
|---------------------------|---------------|------------------------|-------------|-------------|-------------|--------------------------|-------------|-------------|-------------|
|                           |               | Control                | Dex         | CPF         | Dex+CPF     | Control                  | Dex         | CPF         | Dex+CPF     |
| frontal/parietal cortex   | 30            | 0.76 ± 0.04            | 0.83 ± 0.04 | 0.82 ± 0.04 | 0.77 ± 0.03 | 0.78 ± 0.02              | 0.75 ± 0.02 | 0.72 ± 0.04 | 0.78 ± 0.04 |
|                           | 60            | 1.32 ± 0.05            | 1.19 ± 0.10 | 1.18 ± 0.07 | 1.13 ± 0.05 | 1.34 ± 0.01              | 1.16 ± 0.06 | 1.11 ± 0.04 | 1.21 ± 0.05 |
|                           | 100           | 1.16 ± 0.06            | 1.15 ± 0.05 | 1.14 ± 0.07 | 1.17 ± 0.06 | 1.2 ± 0.04               | 1.01 ± 0.06 | 1.13 ± 0.06 | 1.14 ± 0.07 |
|                           | 150           | 1.08 ± 0.03            | 1.06 ± 0.06 | 0.95 ± 0.06 | 0.9 ± 0.06  | 1.01 ± 0.04              | 1.19 ± 0.05 | 1.08 ± 0.02 | 1.00 ± 0.06 |
| temporal/occipital cortex | 30            | 0.71 ± 0.02            | 0.75 ± 0.04 | 0.77 ± 0.03 | 0.71 ± 0.02 | 0.75 ± 0.03              | 0.76 ± 0.03 | 0.76 ± 0.04 | 0.69 ± 0.02 |
|                           | 60            | 0.86 ± 0.03            | 0.89 ± 0.04 | 0.84 ± 0.04 | 0.88 ± 0.02 | 0.86 ± 0.02              | 0.90 ± 0.02 | 0.88 ± 0.03 | 0.90 ± 0.03 |
|                           | 100           | 0.81 ± 0.04            | 0.86 ± 0.05 | 0.75 ± 0.01 | 0.85 ± 0.05 | 0.85 ± 0.03              | 0.91 ± 0.05 | 0.81 ± 0.04 | 0.77 ± 0.03 |
|                           | 150           | 0.75 ± 0.03            | 0.76 ± 0.05 | 0.78 ± 0.05 | 0.71 ± 0.05 | 0.79 ± 0.04              | 0.77 ± 0.03 | 0.71 ± 0.02 | 0.75 ± 0.02 |
| hippocampus               | 30            | 1.09 ± 0.07            | 1.33 ± 0.08 | 1.22 ± 0.03 | 1.14 ± 0.04 | 1.15 ± 0.02              | 1.28 ± 0.05 | 1.26 ± 0.06 | 1.21 ± 0.07 |
|                           | 60            | 1.33 ± 0.04            | 1.40 ± 0.06 | 1.32 ± 0.06 | 1.36 ± 0.08 | 1.42 ± 0.07              | 1.3 ± 0.06  | 1.34 ± 0.04 | 1.43 ± 0.08 |
|                           | 100           | 0.97 ± 0.06            | 0.99 ± 0.03 | 0.94 ± 0.05 | 0.96 ± 0.03 | 1.05 ± 0.04              | 1.18 ± 0.05 | 1.04 ± 0.07 | 1.05 ± 0.04 |
|                           | 150           | 1.36 ± 0.05            | 1.40 ± 0.03 | 1.35 ± 0.05 | 1.39 ± 0.05 | 1.49 ± 0.07              | 1.44 ± 0.06 | 1.36 ± 0.06 | 1.28 ± 0.03 |
| striatum                  | 30            | 1.89 ± 0.15            | 2.29 ± 0.11 | 1.94 ± 0.15 | 2.1 ± 0.11  | 2.25 ± 0.13              | 2.08 ± 0.15 | 1.98 ± 0.09 | 1.98 ± 0.04 |
|                           | 60            | 2.40 ± 0.06            | 2.61 ± 0.20 | 2.63 ± 0.08 | 2.62 ± 0.14 | 2.59 ± 0.08              | 2.65 ± 0.20 | 2.44 ± 0.12 | 2.56 ± 0.22 |
|                           | 100           | 1.80 ± 0.08            | 2.01 ± 0.11 | 1.89 ± 0.15 | 2.25 ± 0.14 | 2.12 ± 0.16              | 2.23 ± 0.14 | 2.10 ± 0.14 | 2.21 ± 0.15 |
|                           | 150           | 1.97 ± 0.08            | 2.05 ± 0.17 | 1.88 ± 0.10 | 2.36 ± 0.12 | 2.27 ± 0.05              | 2.18 ± 0.17 | 2.08 ± 0.11 | 2.19 ± 0.15 |
| midbrain                  | 30            | 0.74 ± 0.03            | 0.77 ± 0.01 | 0.81 ± 0.03 | 0.78 ± 0.02 | 0.84 ± 0.03              | 0.78 ± 0.02 | 0.84 ± 0.04 | 0.80 ± 0.01 |
|                           | 60            | 0.98 ± 0.04            | 1.02 ± 0.02 | 0.99 ± 0.02 | 1.02 ± 0.05 | 0.99 ± 0.03              | 1.07 ± 0.02 | 1.01 ± 0.05 | 0.98 ± 0.03 |
|                           | 100           | 0.86 ± 0.02            | 0.98 ± 0.01 | 0.85 ± 0.05 | 0.86 ± 0.03 | 0.96 ± 0.02              | 0.97 ± 0.06 | 0.99 ± 0.07 | 0.91 ± 0.03 |
|                           | 150           | 0.80 ± 0.04            | 0.91 ± 0.03 | 0.85 ± 0.02 | 0.92 ± 0.03 | 0.85 ± 0.02              | 0.96 ± 0.04 | 0.87 ± 0.03 | 0.90 ± 0.03 |
| brainstem                 | 30            | 1.43 ± 0.05            | 1.51 ± 0.03 | 1.49 ± 0.07 | 1.39 ± 0.05 | 1.61 ± 0.04              | 1.61 ± 0.08 | 1.52 ± 0.04 | 1.5 ± 0.02  |
|                           | 60            | 1.43 ± 0.04            | 1.48 ± 0.04 | 1.59 ± 0.05 | 1.46 ± 0.07 | 1.57 ± 0.06              | 1.59 ± 0.05 | 1.62 ± 0.05 | 1.58 ± 0.06 |
|                           | 100           | 1.39 ± 0.02            | 1.50 ± 0.09 | 1.46 ± 0.06 | 1.37 ± 0.06 | 1.52 ± 0.04              | 1.54 ± 0.02 | 1.49 ± 0.07 | 1.40 ± 0.03 |
|                           | 150           | 1.30 ± 0.05            | 1.28 ± 0.05 | 1.28 ± 0.06 | 1.27 ± 0.04 | 1.44 ± 0.04              | 1.41 ± 0.03 | 1.43 ± 0.06 | 1.41 ± 0.07 |

Abbreviations: Dex = Dexamethasone; CPF = Chlorpyrifos

Note that the assays for each region and age were run in separate experiments, so absolute values cannot be compared strictly across ages or between regions.

**SUPPLEMENTAL TABLE 6: HC3/ChAT ratio (mean ± SE)**

| Region                    | Postnatal Age | Male (fmol/mg protein) |            |            |            | Female (fmol/mg protein) |            |            |            |
|---------------------------|---------------|------------------------|------------|------------|------------|--------------------------|------------|------------|------------|
|                           |               | Control                | Dex        | CPF        | Dex+CPF    | Control                  | Dex        | CPF        | Dex+CPF    |
| frontal/parietal cortex   | 30            | 19.9 ± 1.5             | 17.8 ± 1.3 | 20.6 ± 1.5 | 18.9 ± 1.0 | 18.9 ± 1.2               | 20.5 ± 2.3 | 18.8 ± 1.1 | 16.2 ± 1.2 |
|                           | 60            | 12.2 ± 0.7             | 12.5 ± 1.2 | 11.4 ± 1.0 | 11.1 ± 1.2 | 12.4 ± 1.3               | 11.6 ± 1.2 | 12.9 ± 0.9 | 9.3 ± 0.5  |
|                           | 100           | 11.6 ± 0.8             | 12.2 ± 0.8 | 10.5 ± 1.2 | 8.7 ± 0.4  | 11.6 ± 0.8               | 13.8 ± 0.6 | 11.5 ± 1.3 | 10.5 ± 0.5 |
|                           | 150           | 13.2 ± 0.9             | 12.0 ± 0.9 | 14.4 ± 1.2 | 12.0 ± 1.5 | 13.2 ± 1.5               | 11.6 ± 0.6 | 12.7 ± 0.5 | 12.2 ± 0.6 |
| temporal/occipital cortex | 30            | 10.6 ± 1.5             | 11.1 ± 0.9 | 9.5 ± 1.4  | 9.7 ± 1.9  | 10.2 ± 1.2               | 9.5 ± 1.3  | 12.3 ± 1.6 | 10.9 ± 1.2 |
|                           | 60            | 8.1 ± 0.9              | 9.0 ± 0.9  | 6.5 ± 0.7  | 6.2 ± 0.3  | 8.3 ± 0.5                | 7.5 ± 1.3  | 6.5 ± 0.4  | 6.7 ± 0.6  |
|                           | 100           | 7.4 ± 1.1              | 7.7 ± 1.2  | 6.4 ± 1.0  | 6.9 ± 0.4  | 6.6 ± 0.6                | 6.9 ± 0.5  | 8.2 ± 0.6  | 6.6 ± 1.2  |
|                           | 150           | 15.1 ± 1.7             | 14.1 ± 1.6 | 14.2 ± 1.5 | 13.7 ± 0.5 | 14.2 ± 1.2               | 14.9 ± 1.7 | 13.6 ± 0.7 | 13.8 ± 1.1 |
| hippocampus               | 30            | 10.2 ± 1.6             | 7.4 ± 0.7  | 7.6 ± 0.5  | 8.8 ± 0.5  | 9.6 ± 0.6                | 9.0 ± 1.0  | 8.0 ± 0.6  | 8.3 ± 0.6  |
|                           | 60            | 8.3 ± 1.3              | 7.6 ± 0.7  | 7.7 ± 0.6  | 6.9 ± 0.5  | 6.9 ± 0.3                | 6.6 ± 0.5  | 7.7 ± 0.6  | 7.0 ± 0.4  |
|                           | 100           | 8.0 ± 1.4              | 7.6 ± 0.8  | 8.6 ± 1.2  | 8.0 ± 1.2  | 8.1 ± 0.9                | 8.2 ± 0.8  | 9.7 ± 1.5  | 5.8 ± 1.2  |
|                           | 150           | 9.7 ± 0.6              | 9.8 ± 0.7  | 11.0 ± 1.2 | 9.4 ± 0.5  | 10.0 ± 1.0               | 10.1 ± 0.8 | 9.6 ± 0.5  | 10.1 ± 0.9 |
| striatum                  | 30            | 23 ± 3                 | 18 ± 2     | 18 ± 1     | 16 ± 1     | 18 ± 1                   | 19 ± 2     | 18 ± 2     | 19 ± 1     |
|                           | 60            | 27 ± 6                 | 20 ± 2     | 20 ± 4     | 19 ± 2     | 21 ± 1                   | 20 ± 3     | 20 ± 3     | 15 ± 1     |
|                           | 100           | 20 ± 3                 | 16 ± 1     | 20 ± 4     | 15 ± 1     | 14 ± 1                   | 16 ± 1     | 16 ± 1     | 15 ± 1     |
|                           | 150           | 23 ± 1                 | 20 ± 1     | 19 ± 1     | 17 ± 1     | 18 ± 1                   | 18 ± 1     | 19 ± 1     | 16 ± 1     |
| midbrain                  | 30            | 8.8 ± 0.8              | 10.6 ± 1.1 | 9.7 ± 0.7  | 10.7 ± 0.8 | 8.7 ± 0.8                | 11.6 ± 1.2 | 9.9 ± 0.6  | 10.1 ± 1.2 |
|                           | 60            | 8.7 ± 1.6              | 8.1 ± 1.0  | 6.7 ± 1.1  | 6.1 ± 0.6  | 7.9 ± 0.7                | 6.5 ± 0.5  | 6.9 ± 0.6  | 7.2 ± 0.1  |
|                           | 100           | 6.6 ± 0.5              | 7.6 ± 0.7  | 7.0 ± 0.8  | 7.9 ± 0.8  | 6.6 ± 0.7                | 6.0 ± 0.7  | 7.6 ± 0.5  | 7.2 ± 0.9  |
|                           | 150           | 11.5 ± 1.4             | 8.7 ± 1.0  | 9.2 ± 0.6  | 10.0 ± 0.8 | 9.1 ± 0.7                | 7.8 ± 1.1  | 9.2 ± 0.5  | 7.7 ± 0.5  |
| brainstem                 | 30            | 4.7 ± 0.2              | 4.5 ± 0.3  | 3.3 ± 0.3  | 6.2 ± 0.8  | 3.7 ± 0.2                | 3.8 ± 0.6  | 3.8 ± 0.3  | 4.3 ± 0.3  |
|                           | 60            | 3.3 ± 0.3              | 4.4 ± 0.4  | 3.1 ± 0.2  | 3.9 ± 0.4  | 3.7 ± 0.3                | 3.4 ± 0.4  | 3.6 ± 0.3  | 3.8 ± 0.3  |
|                           | 100           | 2.7 ± 0.2              | 3.2 ± 0.6  | 2.2 ± 0.3  | 2.8 ± 0.3  | 2.2 ± 0.3                | 2.6 ± 0.3  | 2.6 ± 0.3  | 2.9 ± 0.6  |
|                           | 150           | 4.2 ± 0.5              | 3.4 ± 0.1  | 3.1 ± 0.4  | 3.3 ± 0.2  | 2.8 ± 0.2                | 2.9 ± 0.3  | 2.4 ± 0.4  | 3.0 ± 0.3  |

Abbreviations: Dex = Dexamethasone; CPF = Chlorpyrifos

Note that the assays for each region and age were run in separate experiments, so absolute values cannot be compared strictly across ages or between regions.
